# Supplementary material for: Two distinct domains contribute to the substrate acyl chain length selectivity of plant acyl-ACP thioesterase
Source: PubMed Central journal article supplement (PMC5830452; doi:10.1038/s41467-018-03310-z), 2018-02-28
Supplement: 41467_2018_3310_MOESM3_ESM.pdf [file 41467_2018_3310_MOESM3_ESM.pdf]

## Description of Additional Supplementary Files

File Name: Supplementary Movie 1

Description: A rotary view of the acyl-binding cavity in the N-terminal hotdog domain of 2OWN. The residues that form the cavity are shown as magenta and yellow stick models. The four bulky residues that occupy more than 50% of the surface area of the acyl-binding cavity are shown as yellow stick models. Catalytic residues are shown as red stick models. The surface is shown in 20% transparency.
